# Supplementary material for: Wafer-scale bioactive substrate patterning by chemical lift-off lithography
Source: publisher site journal article supplement (doi:10.3762/bjnano.9.31), 2018-01-26
Supplement: Additional file 1 [file 2190-4286-9-31-S1.pdf]

## **Supporting Information**

**for**

# **Wafer-scale bioactive substrate patterning by chemical lift-off lithography**

Chong-You Chen, Chang-Ming Wang, Hsiang-Hua Li, Hong-Hseng Chan, and Wei-Ssu Liao\*

Address: Department of Chemistry, National Taiwan University, Taipei 10617, Taiwan

Email: Wei-Ssu Liao - [wsliaochem@ntu.edu.tw](mailto:wsliaochem@ntu.edu.tw)

\*Corresponding author

## **Additional information**

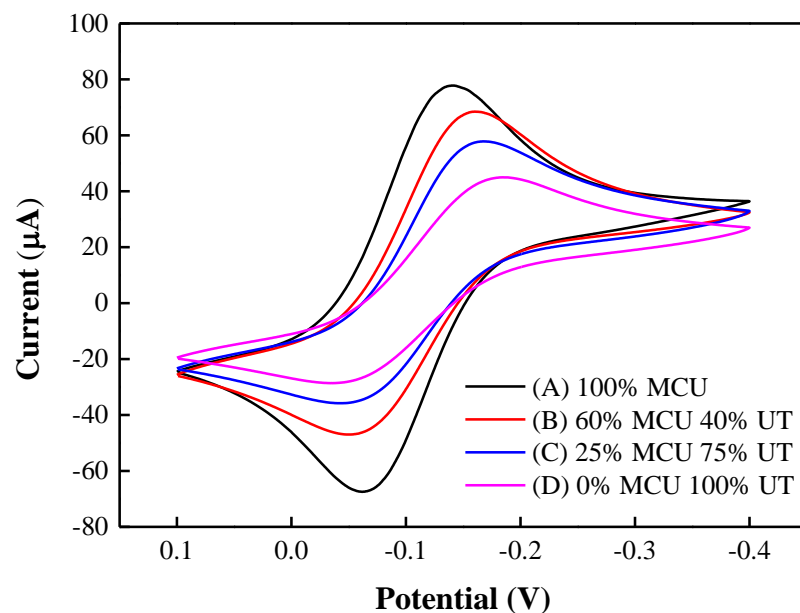

**Figure S1:** Cyclic voltammograms of 1 mM  $[\text{Ru}(\text{NH}_3)_6]^{3+}$  on different CLL-treated substrates when (A) 100% MCU SAM (0% UT), (B) 60% MCU SAM (40% UT), (C) 25% MCU SAM (75% UT), and (D) 0% MCU SAM (100% UT) were used as the lift-off matrix. The measurements were performed in 25 mM Tris buffer at pH 7.4, and the scan rate was 100 mV/s.

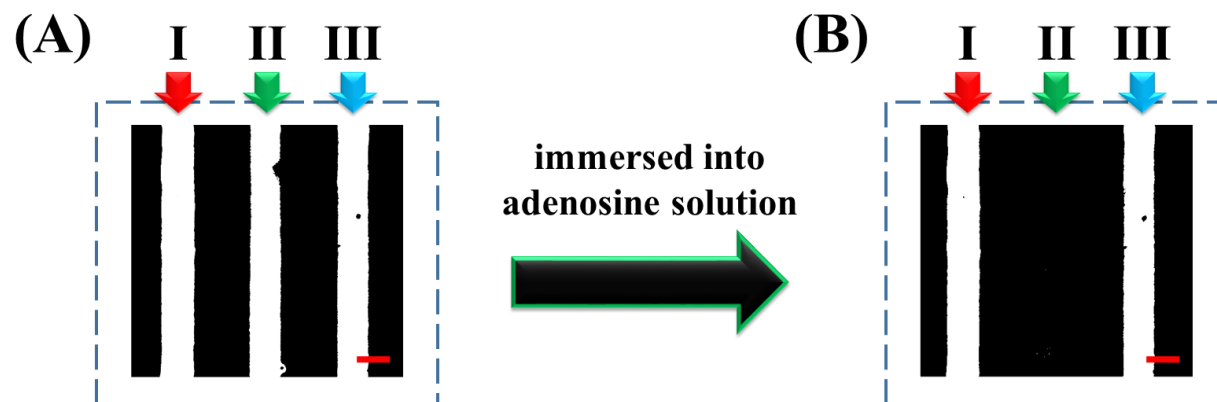

**Figure S2:** The CLL-created multiplexed surface tethered with three different types of DNA probes: I:  $\text{Hg}^{2+}$ -specific, II: adenosine-specific, III: cocaine-specific. The column II fluorescence signal clearly disappears upon the addition of 1 mM adenosine solution. The scale bars are 20  $\mu\text{m}$ .
